# Supplementary material for: Effective Dispensing Methods for Loading Drugs Only to the Tip of DNA Microneedles
Source: MDPI journal article supplement (doi:10.3390/pharmaceutics12100954), 2020-10-10
Supplement: s1 [file s1]

# Supplementary Materials: Effective Dispensing Methods for Loading Drugs Only to the Tip of DNA Microneedles

Moonjeong Bok, Zhi-Jun Zhao, Soon Hyoung Hwang, Hyeok-Joong Kang, Sohee Jeon, Jiwoo Ko, Jiwon Jeong, Young Seok Song, Eunju Lim and Jun-Ho Jeong

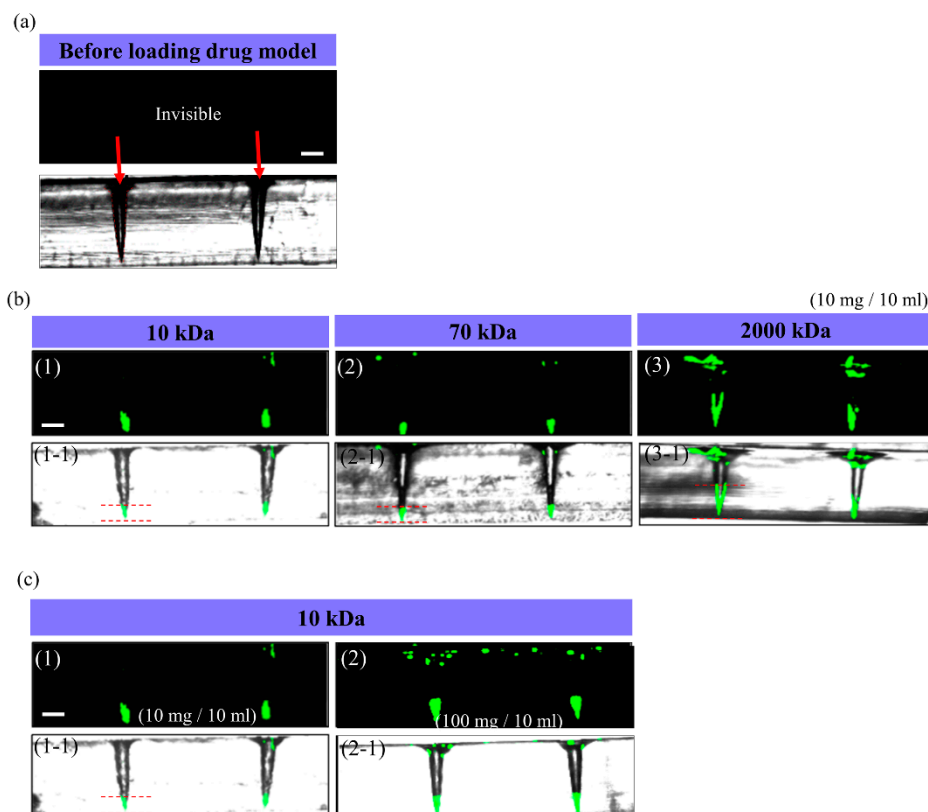

**Figure S1.** Confocal fluorescence and merged images of mold cross sections before and after drug loading. (a) Before loading; (b-1) 10 kDa, (b-2) 70 kDa, and (b-3) 2000 kDa with 10 mg/10 mL; (c-1) 10 mg/10 mL, and (c-2) 100 mg/10 mL with 10 kDa (scale bar: 200  $\mu$ m).

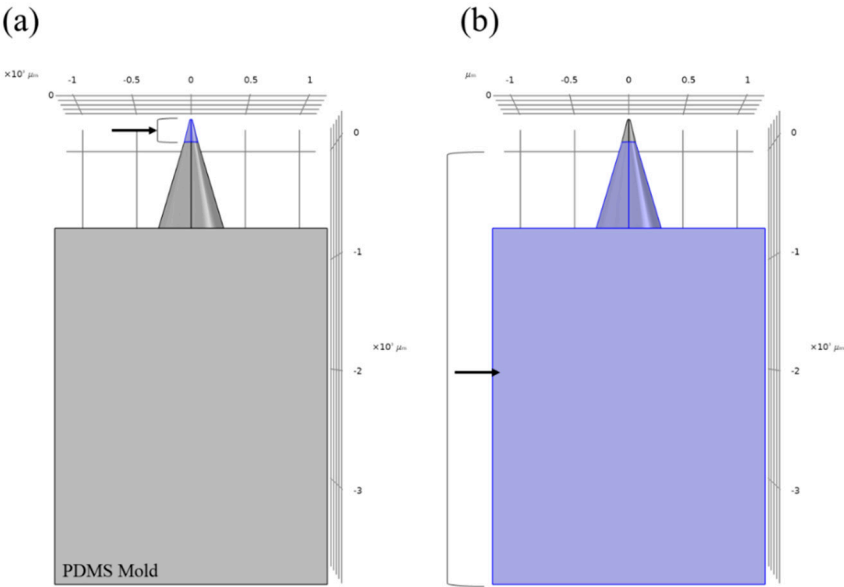

**Figure S2.** Geometric structure of domains. (a) Domain 1; (b) Domain 2.

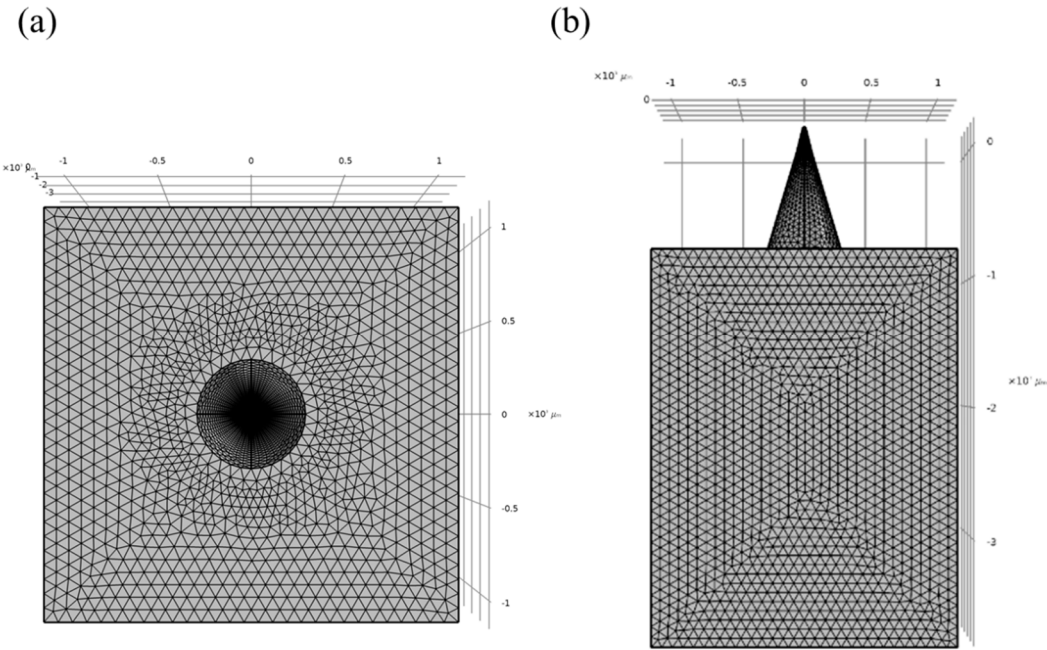

**Figure S3.** Mesh images. (a) Top view; (b) cross section.

**Table S1.** Material parameters employed for domains 1 and 2 in diffusion simulation.

|                                                  | Domain 1               | Domain 2            |
|--------------------------------------------------|------------------------|---------------------|
| Concentration (c, mol/m <sup>3</sup> )           | 1326                   | 0                   |
| Molar volume of solute (v, cm <sup>3</sup> /mol) | 7.54 × 10 <sup>2</sup> |                     |
| Molecular weight (M, g/mol)                      | 10 <sup>4</sup>        | 8 × 10 <sup>5</sup> |
| Temperature (T, K)                               | 300                    | 300                 |
